# 1 **A Multiple Regression Assessment of the Biomineral Urease Activity from Urine** 2 **Drainpipes of California Rest Areas**

3

## 4 **Authors**

5 Kahui Lim †, Harold Leverenz †, Cara Wademan §, Samantha Barnum §

## 6 **Affiliations**

7 † Department of Civil and Environmental Engineering, University of California at Davis

8 § Real-time PCR Research & Diagnostics Core Facility, Dept. of Medicine &

9 Epidemiology, University of California at Davis

10

## 11 **Abstract**

12 Clogging and odor is strongly associated with ureolytic biomineralization in  
13 waterless and low-flow urinal drainage systems in high usage settings. These blockages  
14 continue to hinder widespread waterless and low-flow urinal adoption due to  
15 subsequent high maintenance requirements and hygiene concerns. Through field  
16 observations, hypothesis testing, and multiple regression analysis, this study attempts  
17 to characterize, for the first time, the ureolytic activity of the biomineralization found in  
18 alternative technologies located at 9 State-owned restrooms. Multiple regression  
19 analysis ( $n = 55$ ,  $df = 4$ ,  $R^2 = 0.665$ ) suggests that intrasystem sampling location ( $\hat{\beta} =$   
20  $1.23$ ,  $p < 0.001$ ), annual users per rest area ( $\hat{\beta} = 0.5$ ,  $p < 0.004$ ), and the  
21 organic/inorganic mass fraction ( $\hat{\beta} = 0.59$ ,  $p = 0.003$ ), are statistically significant  
22 influencers of the ureolytic activity of biomineral samples ( $p < 0.05$ ). Conversely, *ureC*  
23 gene abundance ( $p = 0.551$ ), urinal type ( $p = 0.521$ ) and sampling season ( $p = 0.956$ )  
24 are not significant predictors of biomineral ureolytic activity. We conclude that high

25 concentrations of the urease alpha subunit, *ureC*, which can be interpreted as proxy  
26 measure of a strong, potentially ureolytic community, does not necessarily mean that  
27 the gene is being expressed. Future studies should assess *ureC* transcriptional activity  
28 to measure gene expression rather than gene abundance to assess the relationship  
29 between environmental conditions, their role in transcription, and urease activities. In  
30 sum, this study presents a method to characterize biomineral ureolysis and establishes  
31 baseline values for future ureolytic inhibition treatment studies that seek to improve the  
32 usability of urine collection and related source separation technologies.

### 33 **1. Introduction**

34 Waterless and low-flow urinals reduce water consumption, improve hygiene with  
35 touchless operation, and can be used for source separation of urine; additionally,  
36 waterless systems require less plumbing than conventional systems. However, these  
37 source-separation technologies are susceptible to biomineralization [1,2].

38 Biomineralization, usually of a mixed composition of struvite, calcium phosphate,  
39 calcium oxalate, and calcium carbonate, has plagued urine diversion projects since the  
40 earliest projects were studied, leading to clogging, odor, and overall user dissatisfaction  
41 [1–4].

42 Researchers have described the formation of biomineralization in terms of (a)  
43 cellular activities, (b) passive formation of crystals caused by biofilms, and (c) biological  
44 and chemical facilitation of crystal supersaturation conditions [5–7]. Biomineralization in  
45 urine source-separation contexts is likely governed by a combination of mechanisms.

46 Urease and its ureolytic activity are measures of biomineralization potential  
47 because the rate of precipitation is dependent, in part, on the rate of increase of media

48 pH, which depends on the rate of ureolysis. The elevated pH resulting from ureolysis  
49 plays a critical role in the supersaturation crystal formation process. Because urinals are  
50 subject to intermittent supplements of a urea and an ion source, urinals and urine  
51 drainage traps become a selective breeding ground for ureolytic organisms that cause  
52 an increase in the pH of collected urine and facilitate mineral precipitation as has been  
53 observed in urological devices[8]. Ureolytic bacteria responsible for the  
54 biomineralization use the nickel-dependent metalloenzyme, urease, to catalyze the  
55 hydrolysis of urea into ammonia and bicarbonate which in turn raises the pH and  
56 creates conditions favorable of precipitation [4]. Broomfield et al. (2009), in their  
57 catheter study, demonstrated that rates of calcium and magnesium encrustation caused  
58 by various ureolytic bacteria isolates is correlated with an increase in ureolytic activity  
59 [9] An elevated pH promotes calcium phosphate and oxalate stone formation due to a  
60 shift in phosphate speciation from  $\text{HPO}_4^{2-}$  to  $\text{PO}_4^{3-}$  and the decomposition of ascorbic  
61 acid into oxalate—both cases represent an increase in ion concentrations that lead to  
62 elevated encrustation rates found in catheters [10]. Ureolysis also results in carbonate  
63 and bicarbonate ion formation which can further contribute to biomineralization as the  
64 urine becomes supersaturated [11]. Researchers similarly showed that greater ureolytic  
65 rates from bacterial urease are correlated with greater rates of calcium carbonate  
66 precipitation [12–14]. Studies using *Proteus mirabilis* have shown that urease defective  
67 mutants fail to form crystalline biofilms in laboratory models, demonstrating the key role  
68 of pH and urease activity in crystal formation [15]. In dental plaque studies, researchers  
69 suggest that ammonia generating capacity in a mixed-species model of ureolytic oral  
70 biofilms is essential for the stabilization of microbial communities in ureolytic

71 environments [16]. Losses of sufficient quantities of urease resulted in the acidification  
72 of biofilms and a decrease in community diversity [16].

73 Through multiple linear regression modelling, this study will be the first of its kind  
74 to: (a) model biomineral enzyme activity in terms of both categorical and quantitative  
75 predictors, (b) examine biomineral enzyme activity from urine source-separation  
76 technology, and (c) do so on a geographic scale with a sufficiently large sample size.  
77 This study also builds upon previous works describing soil or biofilm ureolytic activity  
78 that (a) use small sample sizes in parametric hypothesis tests ( $n=6$ ) or multiple  
79 regression ( $n=4$ ), (b) neglect discussion of model validation beyond the coefficient of  
80 determination ( $R^2$ ), (c) do not discuss whether their data fits assumptions required for  
81 application of a statistical test, and (d) mention statistical significance, but not practical  
82 significance, i.e. the magnitude of effect [17–20].

83 Finding a link between environmental parameters such as intrasystem sampling  
84 location, usage frequency, seasonality, gene abundance found through qPCR, and  
85 urinal types with the enzymatic activity of the biomineral samples will be useful in  
86 understanding the effects of restroom configuration on ureolytic activity. Understanding  
87 the effect of seasonality and sampling locations within a urine drainage system where  
88 ureolytic activity is highest may be insightful when predicting locations and times of year  
89 where the components of the urine collection system are most susceptible to biomineral  
90 fouling.

## 91 **2. Materials and Methods**

92 The coming subsections will describe the sampling procedures and locations  
93 followed by methods used in downstream analyses to quantify the environmental

94 variables used in the statistical analyses. The R Markdown HTML output containing the  
95 script can be found in the Online Resources section. The raw environmental data can  
96 be found in the Dryad repository (DOI:10.25338/B82906) as an .RDS file.

## 97 **2.1 Sample Collection**

98 Rest areas were categorized by the types of urinals installed: conventional ~ 1  
99 gal/flush, low-flow ~0.125 gal/flush, and waterless no flush. Biomineralization deposits  
100 were scraped into sterile 50 mL conical tubes from fouled fixtures and drainage systems  
101 when available. A total of 2 conventional, 2 low-flow, and 5 waterless public restrooms  
102 along California highways, also known as rest areas, were observed in this study. A  
103 summary of sites, drainpipe configurations, and characteristic samples are shown in  
104 Figure 1 as: (a) location of sampling sites with respect to urinal type used in this study,  
105 (b) biomineralization formation on a waterless urinal cartridge at Erreca on 16 Sep  
106 2019, (c) a view of reduced internal pipe diameter by biomineralization in a urine  
107 drainage pipe at the Dunnigan northbound oriented public rest area on 12 Dec 2019,  
108 and (d) general drainage system layout consisting of the drains directly connected to the  
109 urinals, which collectively flows into a main drain also connected to the sink drains. The  
110 men's restrooms were typically fitted with two urinals at two different heights to conform  
111 to the American Disability Act (ADA).

112 All samples were stored in an ice chest after collection and processed within  
113 three days of sample collection. Previous work monitoring the ureolysis rate in soils  
114 have found that a distinct slowdown in ureolytic rate was not detected until 8 months of  
115 cooled storage [21]. As such, the sampling preservation measures were deemed  
116 adequate.

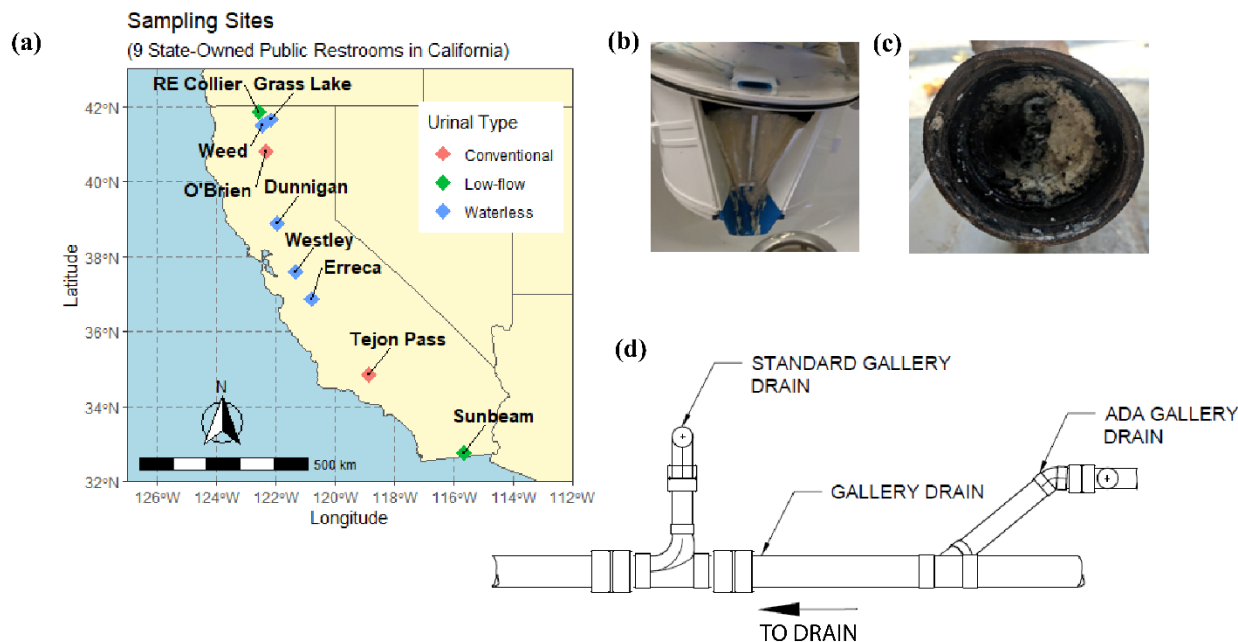

117

118

**Fig. 1** Sampling sites, characteristic samples, and typical drainage system

119

configurations

120

## 121 2.2 Biomineral Ureolytic Enzyme Activity Characterization

122

To compare enzymatic activities of biomineral samples between various sites *in vitro*, a known wet mass of the biomineral samples was suspended and mixed in a 100 mL volume of 7.3 pH 200 mM (4-(2-hydroxyethyl)-1-piperazineethanesulfonic acid) (HEPES) buffer containing 2.5% urea m/m. The rate of increase in conductivity is proportional to that of urea hydrolysis and can be used as a surrogate measure for enzymatic activity [22]. As a comparative basis between samples, one unit of specific activity is defined as  $\text{uS cm}^{-1}\text{min}^{-1}$  per gram of volatile solids (VS).

129

Gravimetric analyses followed standard methods for the examination of water and wastewater [23]. A mass balance was performed by comparing the wet solid mass

130

131 with the dry mass following 105°C desiccation and fixed mass after 550°C ashing. Total  
132 solids (TS) represent the inorganic matter in the sample while VS represents organic  
133 matter. Each biomineral sample was analyzed in triplicate and then averaged.

### 134 **2.3 Quantifying Gene Abundance using Real-time Polymerase Chain Reaction** 135 **(qPCR)**

136 To examine the relationship between *in vitro* ureolytic activity and the genetic  
137 predispositions for ureolysis, the genomes of phylotype representatives for the presence  
138 of urease genes were examined by qPCR. A similar protocol was described previously  
139 [24]. The urease associated gene were designed on the urease alpha subunit encoding  
140 gene (*ureC*). Primer sequences were obtained from the literature [25]. Sensitivity and  
141 efficiency were established from the y-intercept and slope of the standard curve, which  
142 was created by running triplicate, 10-fold serial dilutions of plasmid DNA containing the  
143 ligated amplicon of each gene (Eurofins Genomics LLC, Louisville, KY). The sensitivity  
144 of ureC-F (TGGGCCTTAAAATHCAYGARGAYTGGG) and ureC-R  
145 (SGGTGGTGGCACACCATNANCATRTC) was <4,000 copies/qPCR reaction and the  
146 efficiency was 80.6% ( $R^2 = 0.9974$ ). Poor sensitivity and low efficiency for *ureC* is  
147 expected due to the nature of SYBR degenerative primers. Biomineral samples were  
148 kept frozen at -20°C prior to DNA extraction. DNA was manually extracted from 0.25 g  
149 of sample using a commercially available kit following manufacturer recommendations  
150 and eluted in 100  $\mu$ L of diethylpyrocarbonate (DEPC) treated water (Qiagen DNeasy  
151 Power Soil Kit, cat # 12888-50). Each 12  $\mu$ L reaction contained 6  $\mu$ L SYBR master mix  
152 (Applied Biosystems SYBR Green PCR Master Mix, cat # 4309155), 0.48  $\mu$ L of a  
153 primer-water mixture (primers at final concentration of 400 nM), 4.52  $\mu$ L of DEPC-

154 treated water, and 1  $\mu$ L of extracted DNA. qPCR was performed using an automated  
155 fluorometer (ABI PRISM 7900 HTA FAST, Thermo Fisher Scientific). Standard  
156 amplification conditions were used: 95°C for 3 min, 40 cycles of 95°C for 15 s, 52°C for  
157 30 s, and 72°C for 30 s, with a melting curve at 95°C for 15 s, 52°C for 15 s, and 95°C  
158 for 15 s. Data was analyzed using Applied Biosystems SDS software, version 2.4.  
159 Fluorescent signals were collected during the annealing phase and  $C_q$  values extracted  
160 with a threshold of 0.2 and baseline values of 3–10 for the *ureC* assay . Amplification  
161 specificity was verified using the dissociation temperature ( $T_m$ ) of the qPCR amplicons  
162 specific to each gene. Acceptable  $T_m$  ranges were determined to be +/- 2% of the  
163 positive controls. For *ureC*, the acceptable  $T_m$  range was 80.8°C - 84.1°C. Samples with  
164 detectable amplification but with  $T_m$ 's outside of the acceptable ranges were considered  
165 false positives and were deemed negative for the gene of interest. The absolute copy  
166 numbers were also normalized in terms of volatile solids (VS) mass present in the  
167 biomineral samples.

## 168 **2.4 Statistical Analyses**

169 All statistical work and data visualization was done using R version 4.0.2. An a-  
170 priori power analysis was first used to inform the design of this study, suggesting that a  
171 linear model can sufficiently capture a large effect size ( $f=0.35$ ) at a level of significance  
172 of 0.05 for a power of 0.8 using 1 tested dependent variable and 5 total predictors with a  
173 minimum sample size of 25 [26]. After excluding sample rows missing data from low  
174 quality qPCR reads and samples that did not have enough mass for gravimetric  
175 analysis or biomineral enzyme activity, this randomly sampled, complete case analysis  
176 included a sample size of 55 from 9 different facilities. In the regression analysis,



177 conventional urinals were aggregated with low-flow urinals because both urinal types  
178 include flush water. A stepwise forward variable selection method was used. A  
179 corrected Akaike information criterion (AICC) was also used to validate model selection  
180 [27]. The ordinary least squares (OLS) multiple regression analysis was performed  
181 assuming that a natural log-log transformed linear model is an adequate descriptor of  
182 the system, whereby normality was verified in the Supplementary Information section. A  
183 natural log-log transformed dataset enables for a practical interpretation of the effect  
184 size as a percent change, or in this case, the elasticity between two biological variables  
185 [28]. Regression coefficients were interpreted as natural log-level for categorical  
186 variables. For the coming subsections, unless specified, variables will be discussed in  
187 terms of natural logarithms.

## 188 **2.5 Characterizing the Ureolytic Activity in Urinal Traps *in situ***

189 *In situ* urinal trap testing was conducted to characterize the ureolytic rate at the  
190 time of sample collection within the urine drain trap. *In situ* biomineral ureolytic activity  
191 was used to support the regression analysis derived from *in vitro* urease assays. The  
192 project team developed a method using pH and conductivity meters to characterize the  
193 baseline ureolytic rates. A description of the trap testing is shown graphically in Figure  
194 2.

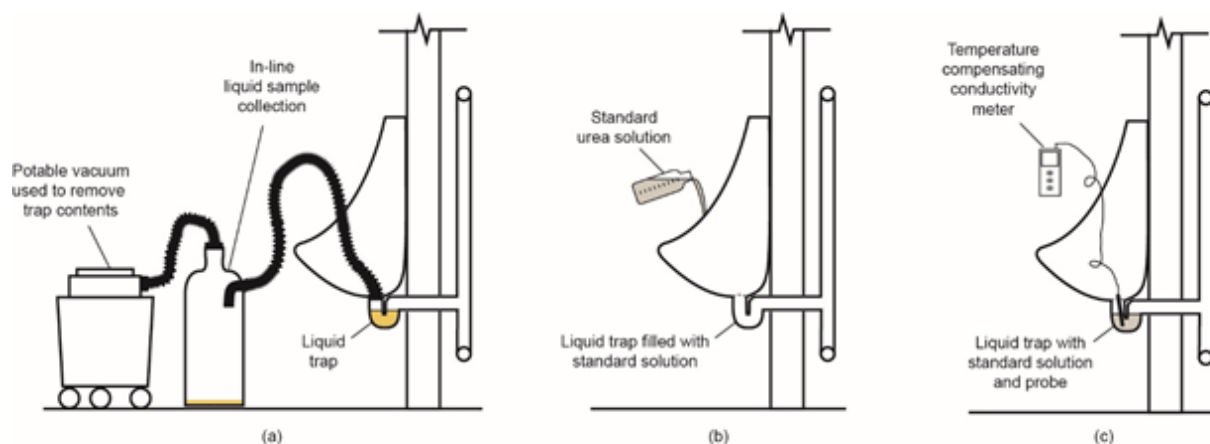

195

196 **Fig. 2** Schematic of *in situ* trap activity test procedure: (a) using portable vacuum and  
197 in-line liquid sample collector to remove trap contents, (b) application of standard urea  
198 solution to empty trap, and (c) testing of urinal liquid trap to determine relative activity

199

200 The in-situ urinal trap procedure was conducted as follows:

201 First, the urine drain trap is vacuumed out as shown in Figure 2. Once emptied, a  
202 200 mM 7.3 pH HEPES buffer containing 2.5% m/m urea is added until the drain trap is  
203 full. Logging pH and EC meters were submerged in the trap opening and recorded for a  
204 total of 10 minutes from which the ureolytic rate could be estimated using the rate of EC  
205 formation.

### 206 3. Results and Discussion

207 After evaluating and selecting the most parsimonious multiple linear regression  
208 model composed of categorical and quantitative environmental variables, the observed  
209 influence, or lack thereof, of these variables will be discussed in the context of  
210 biomineral ureolytic activity.

### 211 **3.1 Multiple Linear Model and Validation**

212 The multiple linear model composed of 55 observations is described in Tables 1  
213 and 2. As shown in correlation heatmaps and residual analysis from Supplementary  
214 Figures 1 and 2, the linear model is in agreement with the Gauss-Markov OLS  
215 regression assumptions, which require that: a) the expected value of the regression  
216 residuals tends towards zero, b) the residuals are homoscedastic c) there is no  
217 autocorrelation between the regressors and the residuals such that exogeneity is  
218 upheld, d) the predictors are not multicollinear, and e) the residuals are also normal  
219 [28]. The residuals shown in Supplementary Figure 1 do not appear to have a trend  
220 based on the index plot, do not exhibit any correlation with each other from the  
221 autocorrelation plot, and appear homoscedastic from the fitted values vs. residuals plot.  
222 Finally, the residuals also appear normally distributed from the quantile-quantile plot in  
223 Supplementary Figure 1. It was concluded that the natural log-log linear model  
224 appropriately describes natural logarithmically transformed data and that the model fits  
225 well with the data. The AICC model selection results are shown in Supplementary Table  
226 2, suggesting that the most parsimonious and probable model is Model 3 [27,29].

227 The regression results describing the most probable model (Model 3) is shown in  
228 Table 1 and 2, which also depicts the regression results from other tested models. The  
229 results presented in Tables 1 and 2 suggest that *ureC* gene concentrations (Model 4,  $p$   
230 = 0.551), sampling season (Model 5,  $p = 0.956$ ), and urinal types were statistically  
231 insignificant predictors of ureolytic activity ( $p > 0.05$ ) and of low practical significance as  
232 indicated by the relatively small regression coefficients (see Table 6). From Table 1, the  
233 strongest predictor of biomineral ureolytic activity was the sampling location, namely,

234 those sampled from the main urinal drainage pipes exhibited the greatest enzymatic  
 235 activity. In Model 3, the second strongest predictor was the organic to inorganic fraction.  
 236 Annual number of users at a given rest area also positively influenced urease activity  
 237 likely due to the increased loading and usage frequency resulting in a semi-constant  
 238 stream of nutrients and salts necessary for a strong ureolytic community to develop and  
 239 thrive.

240 **Table 1** Summary of effect sizes of significant predictors on biomineral ureolytic activity

| <b>Significant Predictor Variables</b> | $\hat{\beta}$ | <b>CI (95%)</b> | <b>Effect on Biomineral Activity per g VS as Elasticity<sup>a</sup></b>                                                                                      |
|----------------------------------------|---------------|-----------------|--------------------------------------------------------------------------------------------------------------------------------------------------------------|
| Annual Users per Rest Area             | 0.5           | 0.17, 0.82      | A 25% increase in annual users per rest area corresponds to a 11.7 (3.9, 20.1) % increase in biomineral activity                                             |
| VS/TS (g/g)                            | 0.59          | 0.21, 0.97      | A 25% increase in VS/TS (g/g) corresponds to a 14.1 (4.8, 24.2) % increase in biomineral activity                                                            |
| Intrasystem Location: Main Drain       | 1.24          | 0.83, 1.64      | Compared to samples obtained from cartridges, those obtained from the gallery main drain had a 245 (129, 416) % larger geometric mean in biomineral activity |

241 <sup>a</sup> Parenthetical contents represent effect sizes at limits of confidence intervals

242 **Table 2** Multiple regression summary of model predicting biomineral ureolytic activity

|                                          | <b>Model 1</b>                            | <b>Model 2</b>                         | <b>Model 3</b>                         | <b>Model 4</b>                         | <b>Model 5</b>                         | <b>Model 6</b>                         |
|------------------------------------------|-------------------------------------------|----------------------------------------|----------------------------------------|----------------------------------------|----------------------------------------|----------------------------------------|
| Predictor Variables                      | Estimates                                 | Estimates                              | Estimates                              | Estimates                              | Estimates                              | Estimates                              |
| Intercept                                | <b>-7.35</b><br><b>(-12.80 – -1.90)**</b> | -2.18<br>(-6.92 – 2.57)                | -0.55<br>(-5.05 – 3.94)                | -0.46<br>(-5.00 – 4.08)                | -0.56<br>(-5.12 – 3.99)                | -0.36<br>(-4.92 – 4.20)                |
| Annual Users per Rest Area               | <b>0.96</b><br><b>(0.56 – 1.37)***</b>    | <b>0.57</b><br><b>(0.22 – 0.92)**</b>  | <b>0.50</b><br><b>(0.17 – 0.82)**</b>  | <b>0.47</b><br><b>(0.14 – 0.81)**</b>  | <b>0.49</b><br><b>(0.16 – 0.83)**</b>  | <b>0.49</b><br><b>(0.16 – 0.82)**</b>  |
| Intrasystem Location: Gallery Drain      |                                           | -0.28<br>(-0.62 – 0.07)                | -0.19<br>(-0.52 – 0.13)                | -0.15<br>(-0.51 – 0.21)                | -0.19<br>(-0.53 – 0.15)                | -0.14<br>(-0.50 – 0.22)                |
| Intrasystem Location: Gallery Main Drain |                                           | <b>1.02</b><br><b>(0.61 – 1.43)***</b> | <b>1.24</b><br><b>(0.83 – 1.64)***</b> | <b>1.26</b><br><b>(0.85 – 1.68)***</b> | <b>1.24</b><br><b>(0.83 – 1.65)***</b> | <b>1.23</b><br><b>(0.82 – 1.64)***</b> |
| VS/TS (g/g)                              |                                           |                                        | <b>0.59</b><br><b>(0.21 – 0.97)**</b>  | <b>0.57</b><br><b>(0.19 – 0.96)**</b>  | <b>0.58</b><br><b>(0.17 – 0.99)**</b>  | <b>0.56</b><br><b>(0.18 – 0.95)**</b>  |
| ureC Concentration (copy #/g VS)         |                                           |                                        |                                        | 0.01<br>(-0.02 – 0.04)                 |                                        |                                        |
| Sampling Season                          |                                           |                                        |                                        |                                        | 0.01<br>(-0.31 – 0.33)                 |                                        |
| Urinal Type                              |                                           |                                        |                                        |                                        |                                        | -0.12<br>(-0.49 – 0.25)                |
| Observations                             | 55                                        | 55                                     | 55                                     | 55                                     | 55                                     | 55                                     |
| R <sup>2</sup> / R <sup>2</sup> adjusted | 0.299 / 0.286                             | 0.595 / 0.571                          | 0.662 / 0.635                          | 0.665 / 0.630                          | 0.662 / 0.628                          | 0.665 / 0.631                          |

243 <sup>a</sup> Significance codes: 0 '\*\*\*' 0.001 '\*\*' 0.05 '\*' 0.1 '.' 1

### 244 **3.2 The Influence of Organic Matter on Ureolytic Activity**

245 That the organic content is significant ( $p = 0.003$ ) and of sizeable effect ( $\hat{\beta} = 0.59$ )  
246 in predicting ureolytic activity, as shown in Table 1, is consistent with past findings from  
247 soil research that found correlations between organic matter concentrations and urease  
248 activity [13,14,30]. Others also observed that increased carbohydrate availability at  
249 neutral pH was correlated with increased *Actinomyces naeslundii* biofilm urease activity  
250 [14,17]. Liu et al. (2008), however, noticed that carbohydrate availability had no effect  
251 on *ureC* gene expression marked by through reverse-transcriptase quantitative real-  
252 time PCR (RT-qPCR) mRNA transcripts. Liu et al. (2008) hypothesizes that these  
253 observations were due to carbohydrate availability and pH modulation affecting the  
254 expression of genes other than *ureC* responsible for urease synthesis or apoenzyme  
255 activation [17].

256 Increasing the biomass of the inoculum by providing a carbon source in microbial  
257 induced calcite precipitation studies has been reported to promote the ureolytic activity  
258 [14]. Tobler et al. (2011) concluded that molasses supplementation selected for a larger  
259 microbial community that obtains their nitrogen from ureolysis, though there is no  
260 nitrogen limitation in urinals [14]. Others, who studied the environmental factors  
261 affecting microbially induced calcium precipitation concluded that increasing biomass  
262 may also increase ureolytic activity as there could be more active cells present [31].  
263 Extracellular urease has also been suggested to be stabilized by adsorption to soil  
264 colloids, particularly organic matter, which may be similar to that observed in biomineral  
265 samples obtained from urine drain pipes [19].

266 One limitation of this study is that it is unclear what component of the organic  
267 fraction is correlated with increased ureolytic activity as VS is a bulk measurement  
268 encompassing any organic mass. Within the biomineral/stone matrix is also an organic  
269 fraction composed of carbohydrates, proteins, lipids, and dead cell mass that binds the  
270 mineral fraction of the precipitate [4]. Therefore, future research could evaluate different  
271 organic components such as proteins and exopolysaccharide substances (EPS).

### 272 **3.3 The Non-effect of Urinal Type and Seasonality on Ureolytic Activity**

273 In addition to the linear regression results, Kruskal-Wallis testing for biomineral  
274 ureolytic activity between waterless and low-flow urinals provides evidence that  
275 waterless and low-flow are likely identical in population in terms of biomineral activity ( $p$   
276 = 0.47). While urinal type is not a statistically significant predictor of ureolytic activity,  
277 biomineral samples from waterless urinals have exhibited a greater maximum ureolytic  
278 activity than any biomineral sample obtained from low-flow urinals in this study, as  
279 shown on Figure 3.

280 Finally, sampling season (as shown in Table 2) demonstrated no statistical ( $p <$   
281 0.001) or practical significance ( $\hat{\beta} = 0.01$ ) in predicting biomineral activity. This may  
282 explain why fouling is a year-round phenomenon, as the biomineral ureolytic activity  
283 remains unaffected by seasonality, as the high urease activities year-round facilitate  
284 conditions necessary for precipitation to occur. Because seasonality does not seem to  
285 impact biomineral activity, future observations on the ureolytic activity of urine  
286 drainpipes may be performed without temporal confounding effects. Though, future  
287 microbial ecology studies are needed to understand the bacterial community structure  
288 of the biomineral samples and should include sampling events from different seasons.

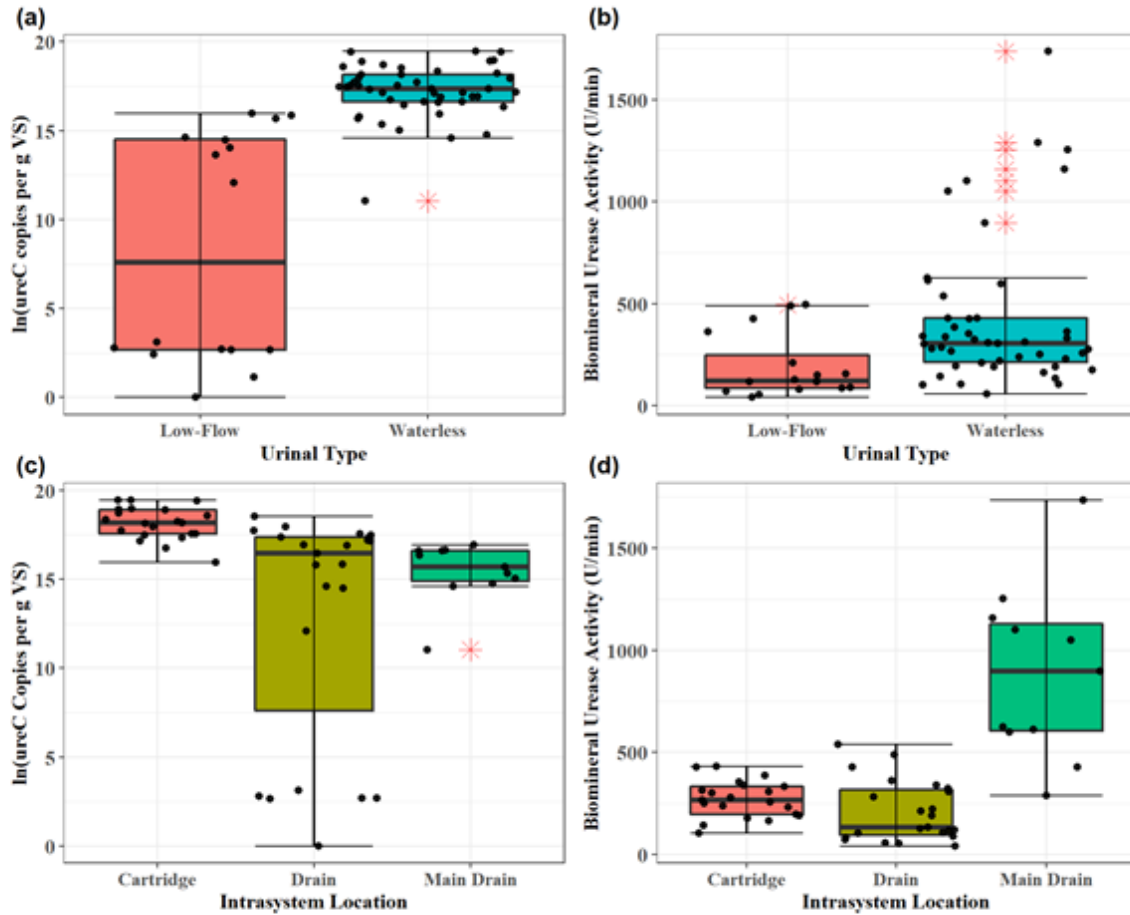

289  
290 **Fig. 3** Descriptive statistics on the effects of urinal type on natural log-transformed *ureC*  
291 gene copies and biomineral activity

### 292 293 **3.4 Effects of Intrasystem Sampling Location on Ureolytic Activity**

294 While the ureolytic activity of biomineral samples obtained from the drainage  
295 pipes immediately following the drain traps were not significantly different from those  
296 corresponding to samples obtained from waterless urinal cartridges (Pairwise Wilcoxon  
297 Rank Sum:  $p = 0.053$ ), samples taken from the main drain lines which contacts  
298 handwashing water were significantly non-identical in terms of ureolytic activity  
299 (Kruskal-Wallis:  $P < 0.001$ ; Pairwise Wilcoxon Rank Sum:  $p < 0.001$ ). Within one



300 system, cartridges and gallery drain lines immediately succeeding the urinal are  
301 exposed to the same urine feed without mixing with potable water and thus face similar  
302 environmental conditions that influence ureolytic activity [13]. Because drain line  
303 samples directly follow cartridge samples and are exposed to the same urine, the  
304 relative similarity in environmental conditions between cartridge and drain line samples  
305 may explain their different ureolytic rates compared to main drainpipe samples but not  
306 with each other.

### 307 **3.5 Biom mineral Ureolytic Activity may be Predicted by Transcriptional Activity** 308 **more than by *ureC* gene abundance**

309 Kruskal-Wallis testing results suggest that the *ureC* abundance between low-flow  
310 and waterless urinals are significantly nonidentical ( $p < 0.001$ ), but there was no  
311 detected significant effect on biom mineral ureolytic activity as suggested by the multiple  
312 regression results shown in Table 2. The lack of statistical significance describing the  
313 relationship between *ureC* gene copies and ureolytic activities disagrees with bivariate  
314 correlation studies done by Fisher et al. (2016) and Sun et al. (2019), where it was  
315 found that soil ureolysis rates were significantly correlated with *ureC* gene copies.  
316 Notably, neither studies discussed effect size and used a small sample size ( $n < 12$ ) for  
317 analyses describing individual soil horizons [32]. Conversely, other soil urease studies  
318 have also found that ureolytic activities are correlated with total nitrogen (TN), total  
319 carbon (TC), and soil organic carbon (SOC) concentrations, but not the abundance of  
320 *ureC* genes as in agreement with our study [33]. The regression results suggest that  
321 ureolytic gene abundance is insufficient in predicting ureolytic activity in a linear model.

322 Greater abundances of potentially ureolytic bacteria indicated by proxy of sample  
323 *ureC* gene concentrations, may not be correlated with biomineral ureolytic rates as  
324 suggested by the regression results. That *ureC* was detectable indicates that part of the  
325 bacterial community in the biomineral samples has the urease-positive genotype, but  
326 not all bacteria with the *ureC* may be displaying a urease-positive phenotype [34]. This  
327 is because urease activity may not be expressed under the growth conditions found in  
328 urine drain pipes, and may explain why urease activities did not differ significantly when  
329 grouped by urinal type [34]. Expression of the urease-positive genotype and the  
330 eventual translation into the urease protein is regulated at the transcriptional level rather  
331 than at the genomic level [35–37].

332 That *ureC* gene abundance is not a statistically significant predictor of biomineral  
333 ureolytic activity is likely due to the need for environmental conditions that would induce  
334 certain microbial transcriptional responses that cause an increase in urease activity.  
335 When comparing *ureC* copies per g VS, values grouped by intrasystem sampling  
336 location differed significantly between cartridge vs. gallery drain (Kruskal-Wallis:  $p <$   
337  $0.001$ ; Wilcoxon Rank Sum:  $p < 0.001$ ) and cartridge vs. gallery main drain (Kruskal-  
338 Wallis:  $P < 0.001$ ; Wilcoxon Rank Sum:  $p < 0.001$ ). However, Figure 3 reinforces  
339 hypothesis testing results in that samples from the main drain with the lowest functional  
340 gene concentrations exhibited maximal ureolytic activity of all samples as predicted by  
341 the multiple regression model. One possible explanation is that the main drains and low-  
342 flow urinal drain lines are exposed to flush and sink water, which leads to a decrease in  
343 nitrogen concentrations in the stream contacting the biofilm due to dilution. In response,  
344 the ureolytic ammonia oxidizing bacterial community may be upregulating *ureC*

345 transcription to produce more urease to convert the urea into ammonia at a faster rate  
346 for pH regulation or to acquire ammonia for biomass production or energy generation  
347 [38]. This hypothesis is in agreement with the literature, as researchers have shown that  
348 *ureC* mRNA transcripts were 10-fold higher in *Ruminococcus albus* cultures grown on  
349 peptides than those grown using an ammonia or urea-based media [39].

350 From Figure 4, the observation that conventional and low-flow urinals can have  
351 similar *in situ* ureolytic rates with those from waterless urinals is consistent with the  
352 regression results where it was found that urinal type is neither a significant ( $p = 0.521$ )  
353 and practical ( $\hat{\beta} = -0.12$ ) predictor of the *in vitro* biomineral ureolytic activity. Figure 4  
354 demonstrates that Dunnigan northbound, a waterless urinal site, exhibited the greatest  
355 maximum *in situ* ureolytic rates. Conversely, Tejon Pass, an SRRA fitted with  
356 conventional urinals, ranked 2<sup>nd</sup> of all sites screened for *in situ* ureolytic rate.

357 Our findings indicate that flush water alone may not be an adequate preventative  
358 measure for preventing ureolytic biomineralization, as urease activity can be as strong  
359 in conventional and low-flow biomineralization as it is in waterless biomineralization,  
360 even if there is a smaller ureolytic community in flush type urinals as indicated by low  
361 relative *ureC* gene concentrations shown in Figure 3. It is also possible that flush water  
362 may also influence the precipitation chemistry in drain lines, as flush water containing  
363 elevated magnesium and calcium concentrations may contribute to crystallization. While  
364 the smaller abundance of *ureC* gene concentrations in low-flow urinal samples is  
365 insufficient in accounting for the similar ureolytic activities exhibited by the two urinal  
366 types and intrasystem sampling locations, the differences in *ureC* gene concentrations  
367 grouped by urinal type shown in Figure 3 may likely be due to a difference in community

368 structures. Future next-generation-sequencing and microbial ecology studies should  
369 visualize the potentially ureolytic microbial community structure by sequencing the *ureC*  
370 gene in addition to 16S rRNA to visualize the total bacterial community to find  
371 relationships between the bacterial community, environmental factors, and ureolytic  
372 activity.

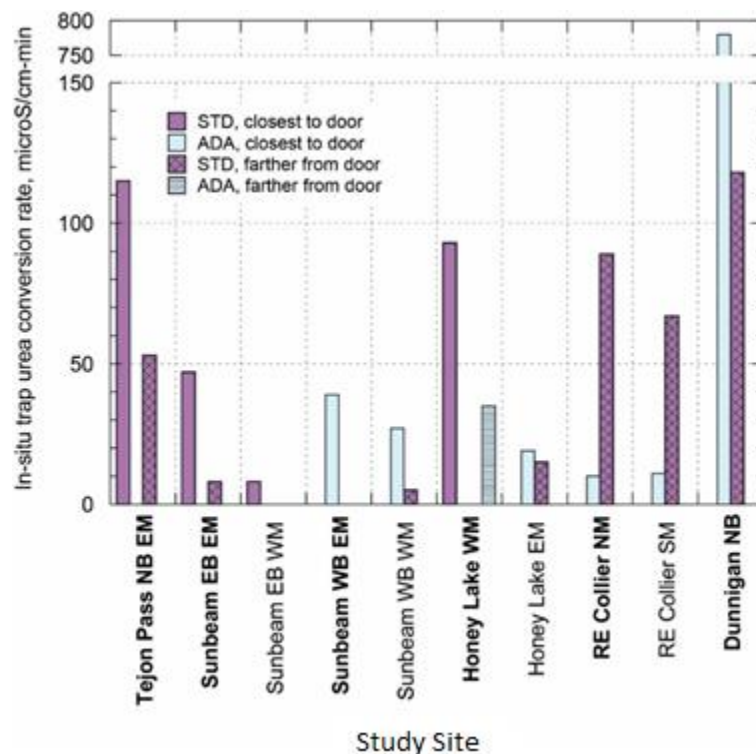

373  
374 **Figure 4** Comparison of *in situ* trap urea conversion rate for various SRRA with trap-  
375 type urinals

376 In conjunction with measuring bulk parameters such as pH, future studies should  
377 incorporate RT-qPCR to determine the effects of nutrient concentrations on urease  
378 gene expression at the transcriptional level. A future RT-qPCR experiment on ureolytic  
379 biomineral samples can reveal how the effects of varying dilution rates between low-

380 flow and waterless urinals affects the transcriptional activity of a gene of interest and its  
381 relationship with ureolytic activity.

## 382 **Conflicts of Interest**

383 The authors declare no competing financial interest.

## 384 **Acknowledgements**

385 This research was funded by the California Department of Transportation under  
386 Agreement Number 65A0734. The authors also thank the American Water Works  
387 Association CA-NV Section for their Graduate Fellowship awarded to Kahui Lim. Finally,  
388 I would like to personally thank my friend, Konrad Franco, sociologist and statistician,  
389 for his insight in developing the statistical model.

## 390 **4. References**

- 391 1. Kvarnström E, Emilsson K. Urine diversion : one step towards sustainable sanitation.  
392 coSanRes Publ Ser [Internet]. 2006;64. Available from:  
393 [www.ecosanres.org/pdf\\_files/Urine\\_Diversion\\_2006-1.pdf](http://www.ecosanres.org/pdf_files/Urine_Diversion_2006-1.pdf)
- 394 2. Lindgren M. Urinsorting Toilets- Clearing of Blockages, Collected Volume, and  
395 Attitudes. 1999.
- 396 3. Flannigan RK, Battison A, De S, Humphreys MR, Bader M, Lellig E, et al. Evaluating  
397 factors that dictate struvite stone composition: A multiinstitutional clinical  
398 experience from the EDGE Research Consortium. *Can Urol Assoc J. Canadian*  
399 *Urological Association*; 2018;12:131–6.
- 400 4. Espinosa-Ortiz EJ, Eisner BH, Lange D, Gerlach R. Current insights into the  
401 mechanisms and management of infection stones. *Nat Rev Urol [Internet]*.

- 402 Springer US; 2019;16:35–53. Available from: <http://dx.doi.org/10.1038/s41585->  
403 018-0120-z
- 404 5. Chen L, Shen Y, Jia R, Xie A, Huang B, Cheng X, et al. The role of *Escherichia*  
405 coliform in the biomineralization of calcium oxalate crystals. *Eur J Inorg Chem.*  
406 2007;3201–7.
- 407 6. Sudhakara Reddy M, Mukherjee A. Biomineralization of Calcium Carbonate  
408 Polymorphs by the Bacterial Strains Isolated from Calcareous Sites improvement of  
409 crop yield by phosphate solubilizing *Aspergillus* species in organic farming View  
410 project Self healing concrete using bacteria View proj. *Artic J Microbiol Biotechnol*  
411 [Internet]. 2013 [cited 2020 May 7]; Available from:  
412 <http://dx.doi.org/10.4014/jmb.1212.11087>
- 413 7. Li X, Chopp DL, Russin WA, Brannon PT, Parsek MR, Packman AI. In situ  
414 biomineralization and particle deposition distinctively mediate biofilm susceptibility  
415 to chlorine. *Appl Environ Microbiol* [Internet]. 2016 [cited 2020 May 10];82:2886–  
416 92. Available from: <http://dx.doi.org/10.1128/AEM.03954-15>.<http://aem.asm.org/>
- 417 8. Lahr RH, Goetsch HE, Haig SJ, Noe-Hays A, Love NG, Aga DS, et al. Urine Bacterial  
418 Community Convergence through Fertilizer Production: Storage, Pasteurization,  
419 and Struvite Precipitation. *Environ Sci Technol.* 2016;50:11619–26.
- 420 9. Broomfield RJ, Morgan SD, Khan A, Stickler DJ. Crystalline bacterial biofilm  
421 formation on urinary catheters by urease-producing urinary tract pathogens: A  
422 simple method of control. *J Med Microbiol. Microbiology Society*; 2009;58:1367–  
423 75.
- 424 10. Schultz LN, Connolly J, Lauchnor E, Hobbs TA, Gerlach R. Struvite Stone

- 425            Formation by Ureolytic Biofilm Infections. *Role Bact Urol* [Internet]. Cham: Springer  
426            International Publishing; 2016 [cited 2019 Nov 28]. p. 41–9. Available from:  
427            [http://link.springer.com/10.1007/978-3-319-17732-8\\_5](http://link.springer.com/10.1007/978-3-319-17732-8_5)
- 428 11. Griffith DP. Struvite stones. *Kidney Int.* 1978;13:372–82.
- 429 12. Chahal N, Rajor A, Siddique R. Calcium carbonate precipitation by different  
430            bacterial strains. *African J Biotechnol.* 2011;10:8359–72.
- 431 13. Mortensen BM, Haber MJ, Dejong JT, Caslake LF, Nelson DC. Effects of  
432            environmental factors on microbial induced calcium carbonate precipitation. *J Appl*  
433            *Microbiol.* 2011;111:338–49.
- 434 14. Tobler DJ, Cuthbert MO, Greswell RB, Riley MS, Renshaw JC, Handley-Sidhu S, et  
435            al. Comparison of rates of ureolysis between *Sporosarcina pasteurii* and an  
436            indigenous groundwater community under conditions required to precipitate large  
437            volumes of calcite. *Geochim Cosmochim Acta.* Pergamon; 2011;75:3290–301.
- 438 15. Holling N, Lednor D, Tsang S, Bissell A, Campbell L, Nzakizwanayo J, et al.  
439            Elucidating the genetic basis of crystalline biofilm formation in *Proteus mirabilis*.  
440            *Infect Immun.* American Society for Microbiology; 2014;82:1616–26.
- 441 16. Shu M, Browngardt CM, Chen YYM, Burne RA. Role of Urease Enzymes in Stability  
442            of a 10-Species Oral Biofilm Consortium Cultivated in a Constant-Depth Film  
443            Fermenter. *Infect Immun.* American Society for Microbiology Journals;  
444            2003;71:7188–92.
- 445 17. Liu Y, Hu T, Jiang D, Zhang J, Zhou X. Regulation of urease gene of *Actinomyces*  
446            *naeslundii* in biofilms in response to environmental factors. *FEMS Microbiol Lett.*  
447            2008;278:157–63.

- 448 18. Fisher KA, Meisinger JJ, James BR. Urea Hydrolysis Rate in Soil Toposequences  
449 as Influenced by pH, Carbon, Nitrogen, and Soluble Metals. *J Environ Qual*  
450 [Internet]. Wiley; 2016 [cited 2020 Feb 28];45:349–59. Available from:  
451 <http://doi.wiley.com/10.2134/jeq2015.05.0228>
- 452 19. Fisher KA, Yarwood SA, James BR. Soil urease activity and bacterial ureC gene  
453 copy numbers: Effect of pH. *Geoderma*. Elsevier B.V.; 2017;285:1–8.
- 454 20. Yaling L, Dan J, Tao H, Xuedong Z. Regulation of urease expression of  
455 *Actinomyces naeslundii* in biofilms in response to pH and carbohydrate. *Oral*  
456 *Microbiol Immunol*. 2008;23:315–9.
- 457 21. Zantua MI, Bremner JM. Stability of urease in soils. *Soil Biol Biochem*. Pergamon;  
458 1977;9:135–40.
- 459 22. Chin W, Kroontje W. Conductivity Method for Determination of Urea. *Anal Chem*  
460 [Internet]. 1961;33:1757–60. Available from:  
461 <http://pubs.acs.org/doi/abs/10.1021/ac60180a039>
- 462 23. Rice EW, Baird RB, Eaton AD. *Standard Methods for the Examination of Water and*  
463 *Wastewater*, 23rd Edition. Am. Public Heal. Assoc. Am. Water Work. Assoc. Water  
464 Environ. Fed. 2017.
- 465 24. Jin D, Zhao S, Wang P, Zheng N, Bu D, Beckers Y, et al. Insights into abundant  
466 rumen ureolytic bacterial community using rumen simulation system. *Front*  
467 *Microbiol*. 2016;7:1–9.
- 468 25. Jin D, Zhao S, Zheng N, Bu D, Beckers Y, Denman SE, et al. Differences in  
469 Ureolytic Bacterial Composition between the Rumen Digesta and Rumen Wall  
470 Based on ureC Gene Classification. *Front Microbiol* [Internet]. Frontiers; 2017



- 471 [cited 2019 Jul 3];8:385. Available from:  
472 <http://journal.frontiersin.org/article/10.3389/fmicb.2017.00385/full>
- 473 26. Erdfelder E, Faul F, Buchner A. GPOWER: A general power analysis program.  
474 Behav Res Methods, Instruments, Comput [Internet]. Psychonomic Society Inc.;  
475 1996 [cited 2020 Sep 20];28:1–11. Available from:  
476 <https://link.springer.com/article/10.3758/BF03203630>
- 477 27. Snipes M, Taylor DC. Model selection and Akaike Information Criteria: An example  
478 from wine ratings and prices. Wine Econ Policy. UniCeSV - Universita degli Studi  
479 di Firenze; 2014;3:3–9.
- 480 28. Wooldridge JM. Introductory Econometrics. 2012.
- 481 29. Symonds MRE, Moussalli A. A brief guide to model selection, multimodel inference  
482 and model averaging in behavioural ecology using Akaike's information criterion  
483 [Internet]. Behav. Ecol. Sociobiol. Springer; 2011 [cited 2020 Sep 20]. p. 13–21.  
484 Available from: [www.vsnr.co.uk/software/genstat/](http://www.vsnr.co.uk/software/genstat/)
- 485 30. Wang L, Luo X, Liao H, Chen W, Wei D, Cai P, et al. Ureolytic microbial community  
486 is modulated by fertilization regimes and particle-size fractions in a Black soil of  
487 Northeastern China. Soil Biol Biochem. Elsevier Ltd; 2018;116:171–8.
- 488 31. Mortensen BM, Haber MJ, Dejong JT, Caslake LF, Nelson DC. Effects of  
489 environmental factors on microbial induced calcium carbonate precipitation. J Appl  
490 Microbiol [Internet]. John Wiley & Sons, Ltd; 2011 [cited 2020 Dec 13];111:338–49.  
491 Available from: [https://sfamjournals.onlinelibrary.wiley.com/doi/full/10.1111/j.1365-](https://sfamjournals.onlinelibrary.wiley.com/doi/full/10.1111/j.1365-2672.2011.05065.x)  
492 [2672.2011.05065.x](https://sfamjournals.onlinelibrary.wiley.com/doi/full/10.1111/j.1365-2672.2011.05065.x)
- 493 32. Fisher KA, Meisinger JJ, James BR. Urea Hydrolysis Rate in Soil Toposequences

- 494 as Influenced by pH, Carbon, Nitrogen, and Soluble Metals. *J Environ Qual*. Wiley;  
495 2016;45:349–59.
- 496 33. Roscoe R, Vasconcellos CA, Furtini-Neto AE, Guedes GAA, Fernandes LA. Urease  
497 activity and its relation to soil organic matter, microbial biomass nitrogen and urea-  
498 nitrogen assimilation by maize in a Brazilian Oxisol under no-tillage and tillage  
499 systems. *Biol Fertil Soils*. Springer; 2000;32:52–9.
- 500 34. Maciejewska M, Adam D, Naômé A, Martinet L, Tenconi E, Całusińska M, et al.  
501 Assessment of the Potential Role of *Streptomyces* in Cave Moonmilk Formation.  
502 *Front Microbiol* [Internet]. Frontiers Media S.A.; 2017 [cited 2020 Apr 24];8:1181.  
503 Available from: <http://journal.frontiersin.org/article/10.3389/fmicb.2017.01181/full>
- 504 35. Chen YYM, Weaver CA, Mendelsohn DR, Burne RA. Transcriptional regulation of  
505 the *Streptococcus salivarius* 57.I urease operon. *J Bacteriol* [Internet]. American  
506 Society for Microbiology; 1998 [cited 2020 Dec 26];180:5769–75. Available from:  
507 <http://jb.asm.org/>
- 508 36. Nicholson EB, Concaugh EA, Foxall PA, Island MD, Mobley HLT. *Proteus mirabilis*  
509 urease: Transcriptional regulation by UreR. *J Bacteriol* [Internet]. American Society  
510 for Microbiology Journals; 1993 [cited 2020 Dec 26];175:465–73. Available from:  
511 <http://jb.asm.org/>
- 512 37. Van Vliet AHM, Kuipers EJ, Waidner B, Davies BJ, De Vries N, Penn CW, et al.  
513 Nickel-responsive induction of urease expression in *Helicobacter pylori* is mediated  
514 at the transcriptional level. *Infect Immun* [Internet]. American Society for  
515 Microbiology Journals; 2001 [cited 2020 Dec 26];69:4891–7. Available from:  
516 <http://iai.asm.org/>

- 517 38. Ganesh S, Bertagnolli AD, Bristow LA, Padilla CC, Blackwood N, Aldunate M, et al.  
518 Single cell genomic and transcriptomic evidence for the use of alternative nitrogen  
519 substrates by anammox bacteria. ISME J [Internet]. Nature Publishing Group; 2018  
520 [cited 2020 Dec 15];12:2706–22. Available from:  
521 [/pmc/articles/PMC6193949/?report=abstract](https://pubmed.ncbi.nlm.nih.gov/31911111/)
- 522 39. Kim JN, Decrescenzo Henriksen E, Cann IKO, Mackie RI. Nitrogen Utilization and  
523 Metabolism in Ruminococcus albus 8. 2014 [cited 2020 Dec 15]; Available from:  
524 <http://dx.doi.org/10.1128>
- 525  
526  
527  
528
